# Supplementary material for: Three-dimensional mapping of a deformation field inside a nanocrystal
Source: Springer Nature journal article supplement (doi:10.1038/nature04867), 2006-07-01
Supplement: 41586_2006_BFnature04867_MOESM2_ESM.pdf [file 41586_2006_BFnature04867_MOESM2_ESM.pdf]

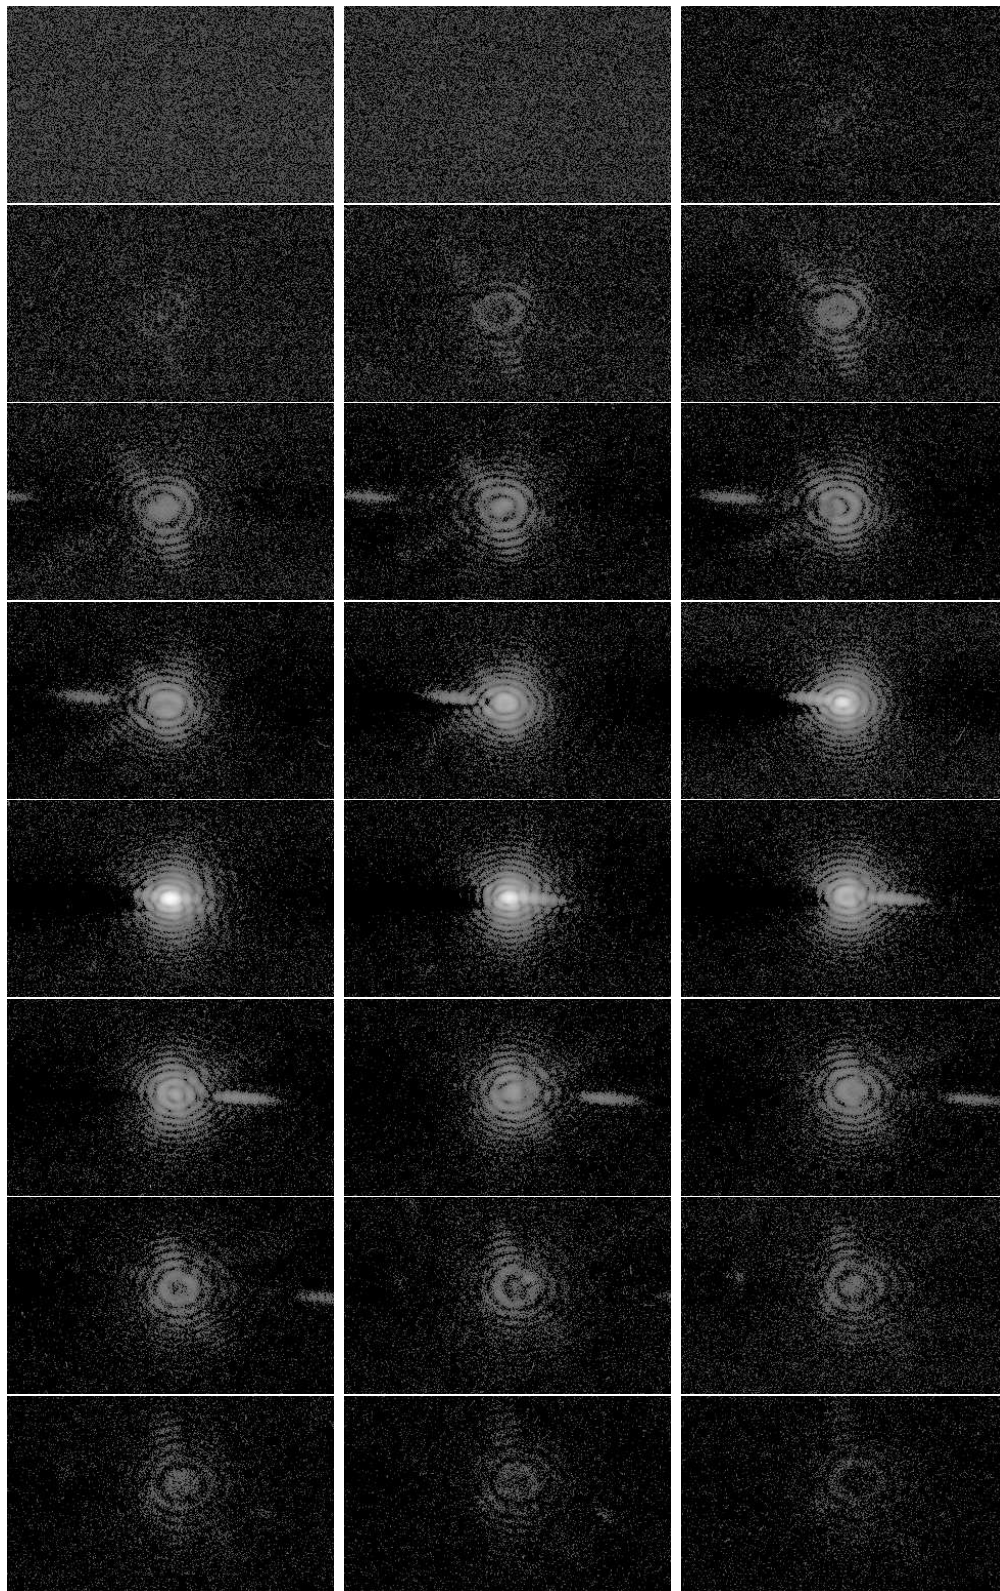

Figure S2: Raw coherent X-ray diffraction data measured for the Pb nanocrystal studied in this work. Every second frame of the rotation series of CCD images is shown. When stacked up, these constitute the 3D diffraction pattern of the sample.
