# Supplementary material for: Three-dimensional mapping of a deformation field inside a nanocrystal
Source: Springer Nature journal article supplement (doi:10.1038/nature04867), 2006-07-01
Supplement: 41586_2006_BFnature04867_MOESM3_ESM.pdf [file 41586_2006_BFnature04867_MOESM3_ESM.pdf]

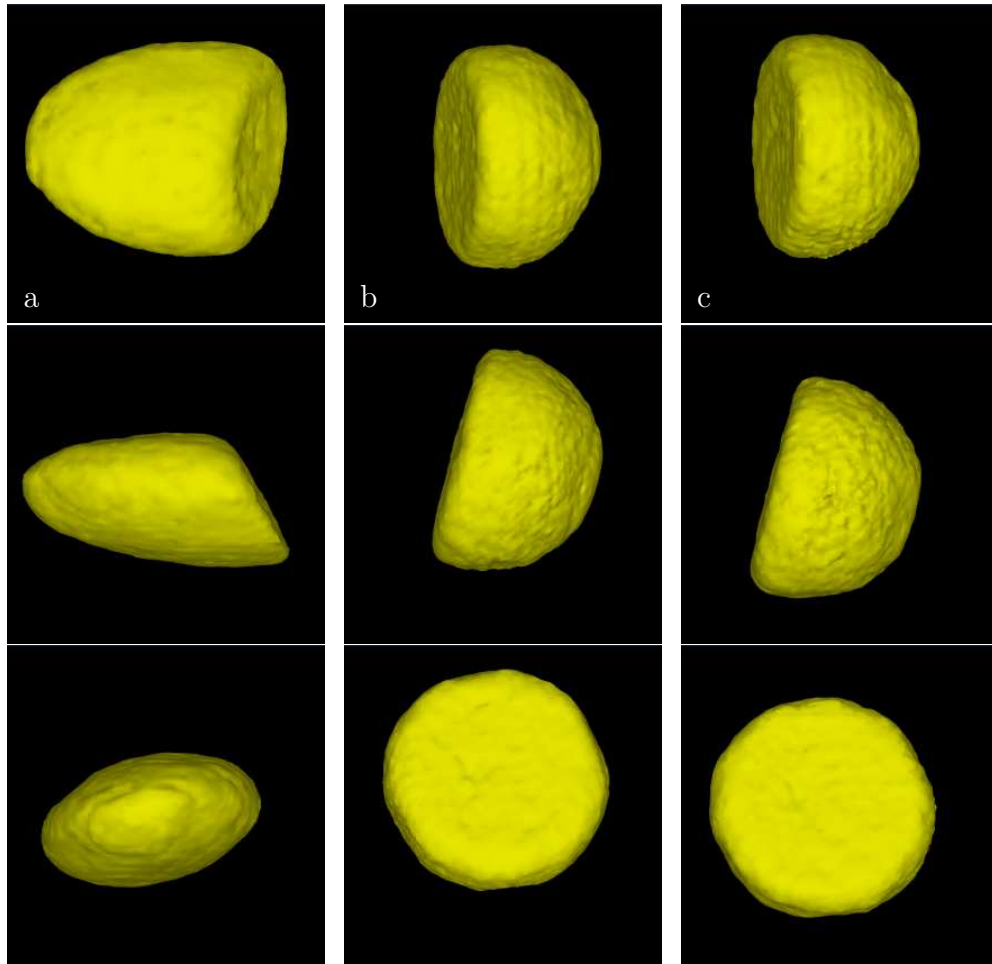

Figure S3: Isosurface views of the nanocrystal density, before (left column) and after (middle and right) performing the geometric correction. The middle and right columns were computed using different random starting phases. The top row is looking upstream towards the source, the middle row is a side view from below the crystal, and the bottom row is the view from the substrate.
