# Supplementary material for: Three-dimensional mapping of a deformation field inside a nanocrystal
Source: Springer Nature journal article supplement (doi:10.1038/nature04867), 2006-07-01
Supplement: 41586_2006_BFnature04867_MOESM4_ESM.pdf [file 41586_2006_BFnature04867_MOESM4_ESM.pdf]

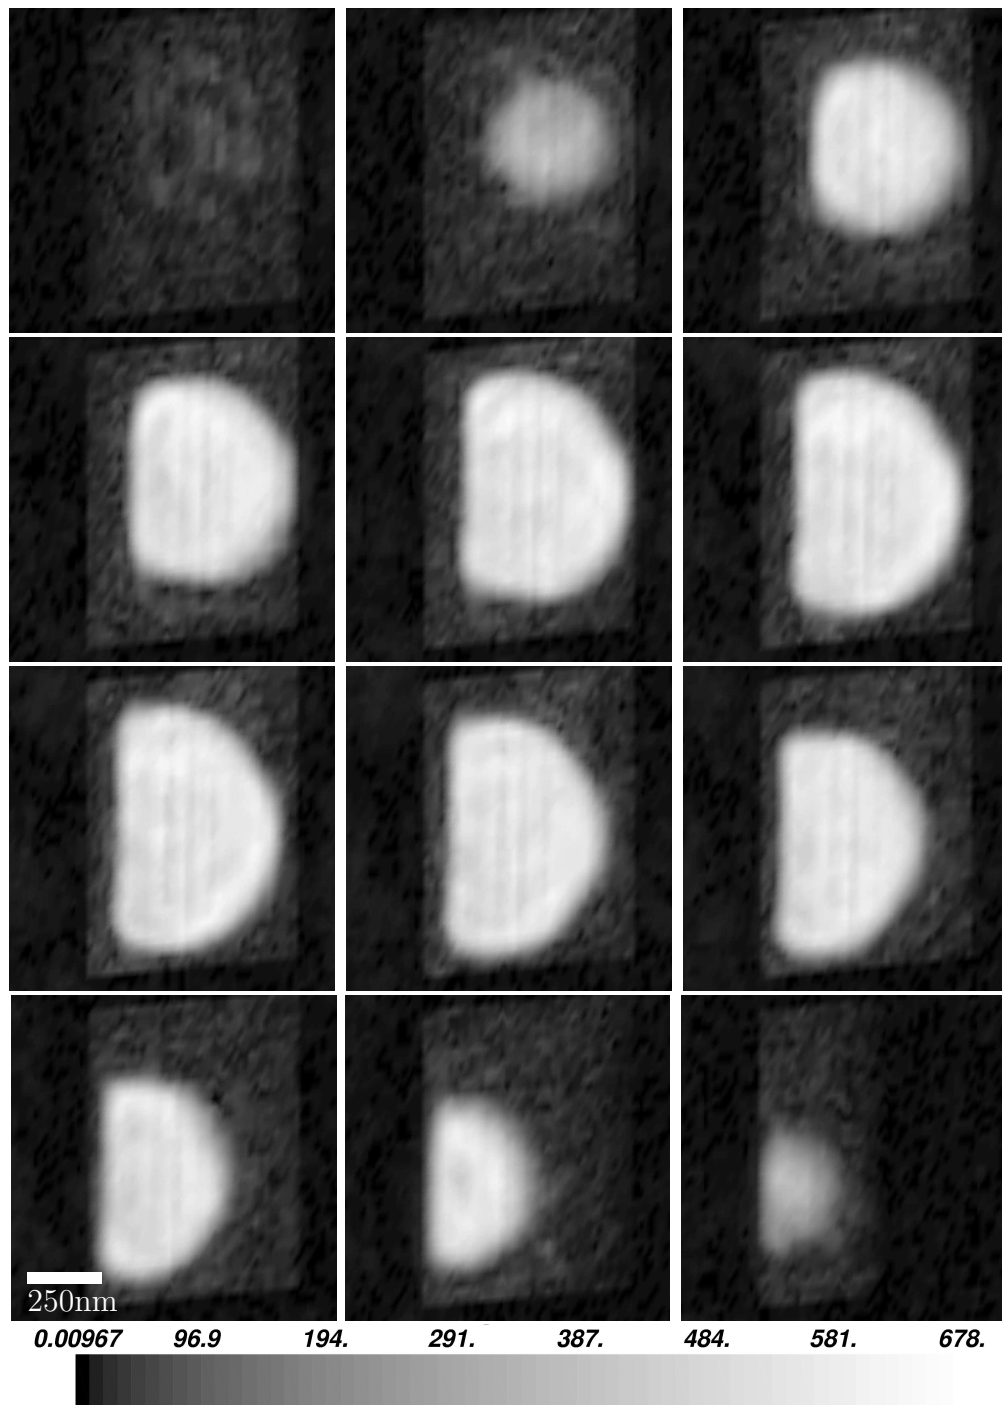

Figure S4: Sections of the real space density map of the crystal. Slices of the final 3D map are shown with 69nm spacing.
