# Supplementary material for: Three-dimensional mapping of a deformation field inside a nanocrystal
Source: Springer Nature journal article supplement (doi:10.1038/nature04867), 2006-07-01
Supplement: 41586_2006_BFnature04867_MOESM5_ESM.pdf [file 41586_2006_BFnature04867_MOESM5_ESM.pdf]

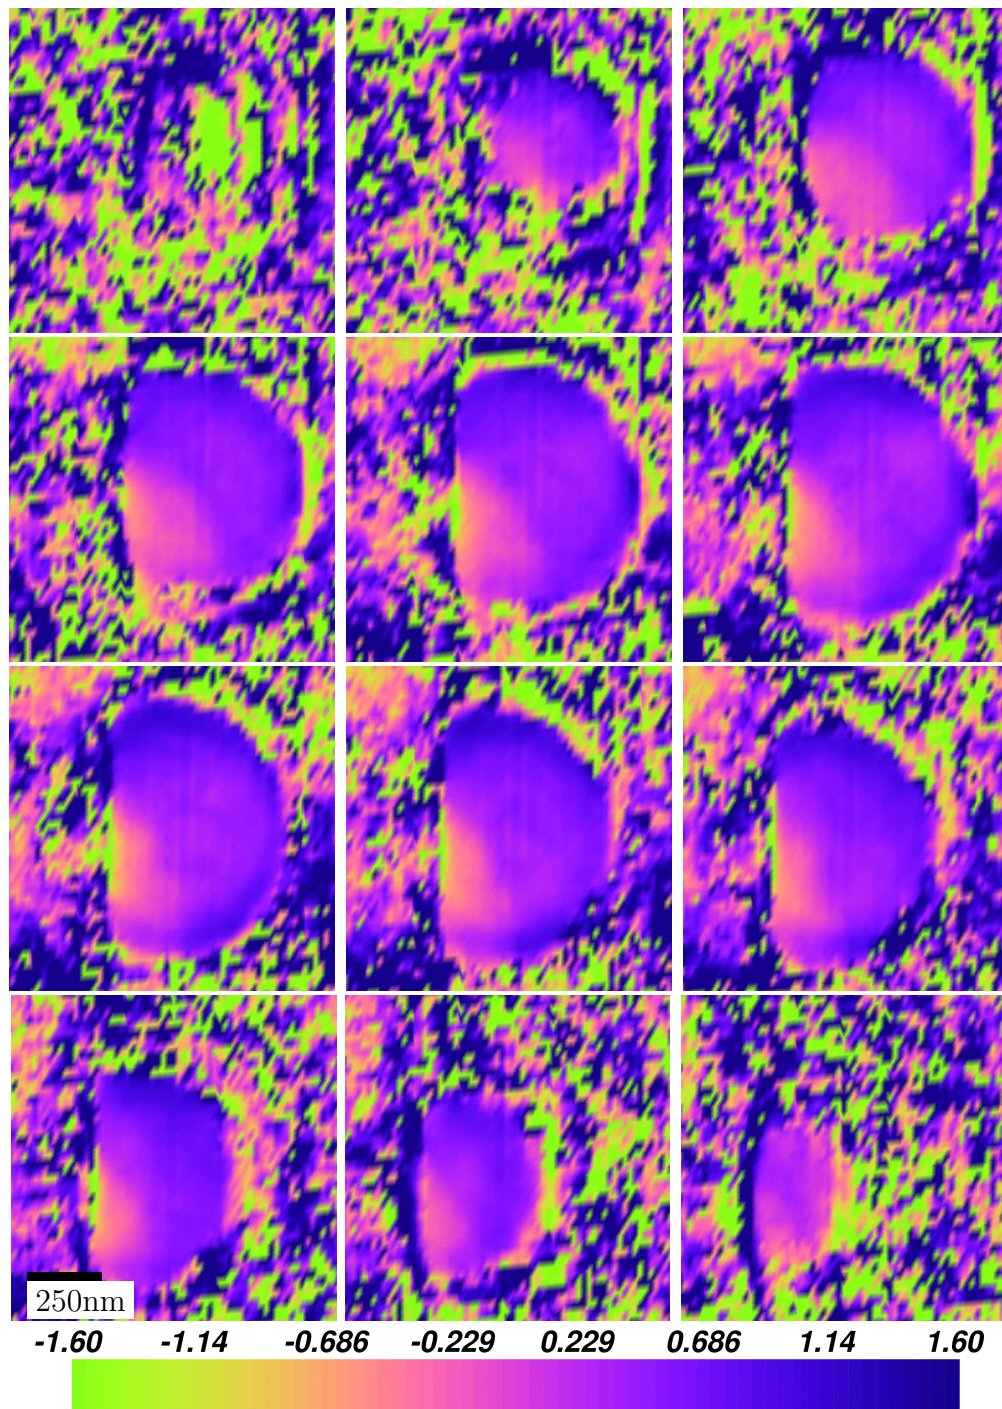

Figure S5: Sections of the real space phase map of the crystal. Phases corresponding to points with low density, i.e. outside the body of the crystal, have little meaning. The slices have a 69nm spacing.
