# Supplementary material for: Three-dimensional mapping of a deformation field inside a nanocrystal
Source: Springer Nature journal article supplement (doi:10.1038/nature04867), 2006-07-01
Supplement: 41586_2006_BFnature04867_MOESM6_ESM.pdf [file 41586_2006_BFnature04867_MOESM6_ESM.pdf]

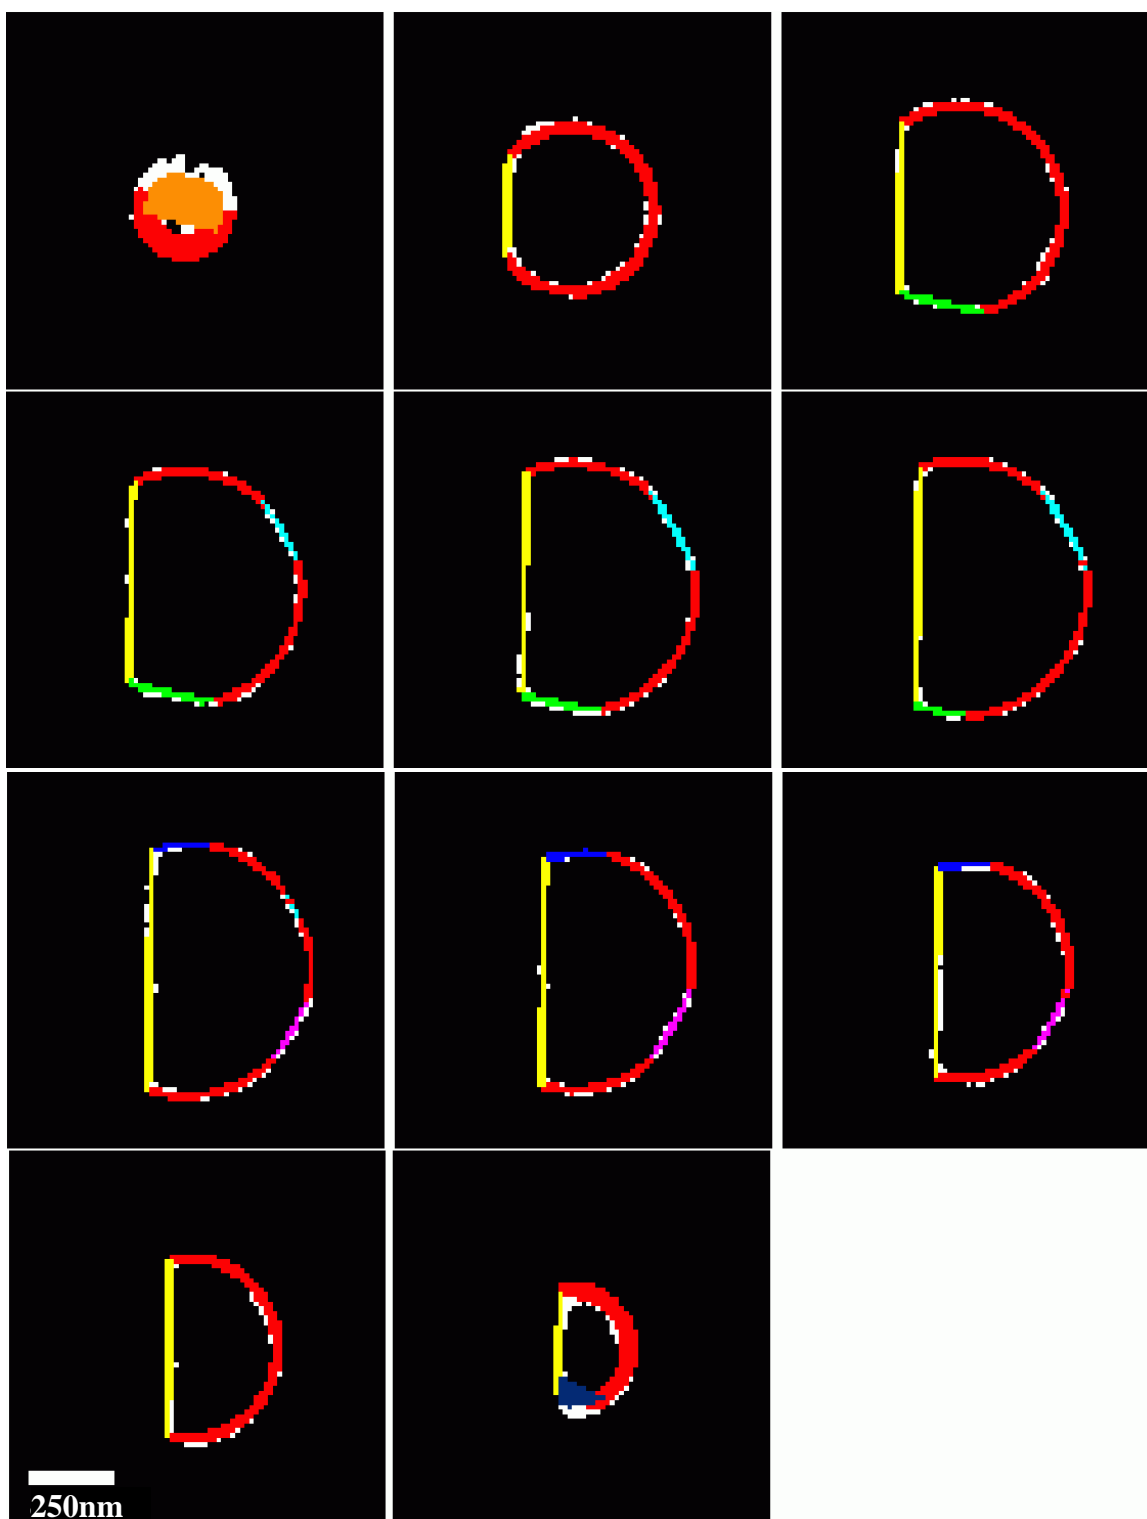

Figure S6: Least-square fits of the shape of the boundary of the real space density map of the crystal. The red curve is the best fitting sphere while the coloured straight lines represent the facets. Every fifth slice from the final 3D map is shown with 69nm spacing.
